# Supplementary material
Source: publisher figshare collection journal article supplement (https://future-science-group.figshare.com/articles/dataset/_/19367861)
Supplement: Supplementary file 1 [file 1]

## Sheet: univariable survival-features
Manuscript: Radiomics of dual-energy CT for predicting progression-free survival in patients with early glottic cancer
DOI: 10.2217/fon-2021-1125
Table S2: All univariate survival features were included to discriminate patients with recurrence from those without recurrence (p < 0.05).
Feature	HR
wavelet.LHL_firstorder_TotalEnergy	2.546
wavelet.LHL_firstorder_Energy	2.3036
wavelet.HHH_glcm_ClusterShade	0.5362
wavelet.LHL_firstorder_Kurtosis	2.1238
wavelet.LHL_gldm_LargeDependenceHighGrayLevelEmphasis	2.1535
wavelet.LHL_glrlm_LongRunHighGrayLevelEmphasis	2.1333
original_shape_MinorAxisLength	4.6103
wavelet.LHL_glcm_Idn	4.6
wavelet.LHL_firstorder_Maximum	2.3012
original_firstorder_10Percentile	0.479
wavelet.HHL_glrlm_LongRunEmphasis	13.109
wavelet.LHL_glszm_GrayLevelVariance	1.9831
wavelet.LHL_firstorder_Range	2.4093
wavelet.HHL_glrlm_RunVariance	4.997
wavelet.LHL_glszm_HighGrayLevelZoneEmphasis	1.9598
wavelet.LHL_ngtdm_Complexity	1.9087
original_ngtdm_Busyness	2.1745
wavelet.LLH_glszm_GrayLevelNonUniformity	2.0516
wavelet.LHL_glrlm_RunLengthNonUniformity	2.0478
original_shape_MeshVolume	1.9271
original_shape_VoxelVolume	1.9333
wavelet.LHH_firstorder_TotalEnergy	2.0262
wavelet.LHL_glcm_Autocorrelation	2.0397
wavelet.LLL_glszm_GrayLevelNonUniformity	3.161
wavelet.LHL_gldm_HighGrayLevelEmphasis	2.0444
wavelet.HLL_glszm_SizeZoneNonUniformity	2.331
wavelet.LHL_glrlm_HighGrayLevelRunEmphasis	2.0331
wavelet.LHL_glszm_SmallAreaHighGrayLevelEmphasis	1.82
wavelet.HLL_glrlm_RunLengthNonUniformity	2.0141
wavelet.LHH_firstorder_Energy	1.9481
original_shape_SurfaceArea	2.257
wavelet.LLH_glrlm_RunLengthNonUniformity	1.941
wavelet.HHL_glrlm_ShortRunEmphasis	0.0005
original_glszm_GrayLevelNonUniformity	2.4952
wavelet.LLH_gldm_DependenceNonUniformity	1.802
wavelet.HLH_glrlm_GrayLevelNonUniformity	1.8077
original_glrlm_RunLengthNonUniformity	1.9623
wavelet.LHH_gldm_DependenceNonUniformity	1.7752
wavelet.LHL_glcm_SumAverage	3.0293
wavelet.LHL_glcm_JointAverage	3.0293
original_shape_Maximum2DDiameterColumn	3.5171
wavelet.HLH_gldm_DependenceNonUniformity	1.7625
wavelet.LHL_glcm_ClusterProminence	1.8111
wavelet.HLL_firstorder_Skewness	1.4935
wavelet.LLH_glrlm_GrayLevelNonUniformity	1.802
wavelet.HHL_glrlm_RunPercentage	0.0029
wavelet.HLH_gldm_GrayLevelNonUniformity	1.7665
wavelet.LHH_glrlm_RunLengthNonUniformity	1.8469
wavelet.LHL_glszm_SizeZoneNonUniformity	2.1015
wavelet.HLL_glrlm_GrayLevelNonUniformity	1.7992
wavelet.LHL_glrlm_GrayLevelNonUniformity	1.8136
wavelet.LHL_gldm_DependenceNonUniformity	1.7739
wavelet.LHH_glrlm_GrayLevelNonUniformity	1.7908
original_glrlm_GrayLevelNonUniformity	1.9104
wavelet.HHL_gldm_LargeDependenceEmphasis	8.9568
wavelet.HHL_gldm_GrayLevelNonUniformity	1.7546
wavelet.LLH_gldm_GrayLevelNonUniformity	1.7436
wavelet.LHH_gldm_GrayLevelNonUniformity	1.7557
wavelet.HHH_gldm_GrayLevelNonUniformity	1.7545
original_gldm_GrayLevelNonUniformity	1.8159
wavelet.HLL_gldm_DependenceNonUniformity	1.7548
wavelet.HHH_glrlm_GrayLevelNonUniformity	1.7756
wavelet.HHL_glrlm_GrayLevelNonUniformity	1.7804
wavelet.LLL_glrlm_RunLengthNonUniformity	1.8112
wavelet.HLH_glrlm_RunLengthNonUniformity	1.827
wavelet.HHL_glrlm_RunLengthNonUniformity	1.8449
wavelet.HLL_firstorder_Mean	1.4898
wavelet.HHH_glrlm_RunLengthNonUniformity	1.8145
wavelet.LHL_glcm_ClusterShade	1.6435
original_gldm_DependenceNonUniformity	1.7497
wavelet.LLL_glrlm_GrayLevelNonUniformity	1.8816
wavelet.HLL_gldm_GrayLevelNonUniformity	1.734
wavelet.HLL_firstorder_TotalEnergy	1.9212
wavelet.LHL_glrlm_ShortRunHighGrayLevelEmphasis	1.9182
wavelet.LLL_gldm_DependenceNonUniformity	1.7771
wavelet.HHL_gldm_DependenceNonUniformity	1.7369
wavelet.LHL_gldm_GrayLevelNonUniformity	1.7357
wavelet.LLL_glszm_SizeZoneNonUniformityNormalized	0.1493
wavelet.LLL_firstorder_Median	0.4544
wavelet.LLL_gldm_GrayLevelNonUniformity	1.8384
wavelet.HLL_firstorder_Energy	1.8999
original_glszm_SizeZoneNonUniformity	2.1666
wavelet.LLL_ngtdm_Busyness	2.3765
wavelet.HHH_glrlm_RunVariance	4.4687
wavelet.HHH_gldm_DependenceNonUniformity	1.6954
wavelet.HHH_glrlm_LongRunEmphasis	12.367
wavelet.LHL_glrlm_RunVariance	3.1496
wavelet.HHL_glrlm_RunLengthNonUniformityNormalized	0.0215
original_firstorder_Median	0.4592
wavelet.LHL_gldm_SmallDependenceLowGrayLevelEmphasis	0.3783
wavelet.HLH_glrlm_ShortRunEmphasis	0.0008
original_glrlm_RunVariance	2.34
wavelet.LHL_ngtdm_Contrast	0.3917
wavelet.HLH_glcm_Imc2	0.1946
wavelet.LHL_gldm_LargeDependenceEmphasis	6.0232
wavelet.LHL_glszm_SmallAreaEmphasis	2.4512
wavelet.HLH_glrlm_RunPercentage	0.0031
wavelet.HHH_glrlm_RunPercentage	0.0018
wavelet.LHL_glcm_Idmn	5.18
wavelet.LHL_glrlm_LongRunEmphasis	4.6532
wavelet.LHL_glszm_LowGrayLevelZoneEmphasis	0.3474
wavelet.LHL_glrlm_RunPercentage	0.0193
wavelet.LHH_glrlm_LongRunEmphasis	8.0785
wavelet.HHH_gldm_LargeDependenceEmphasis	8.1152
wavelet.LHH_glrlm_RunVariance	3.819
original_shape_Maximum2DDiameterRow	3.5186
wavelet.LLL_firstorder_Mean	0.4357
wavelet.LLH_glszm_LargeAreaLowGrayLevelEmphasis	1.6155
wavelet.LLH_glrlm_RunPercentage	0.0149
original_shape_Maximum2DDiameterSlice	3.6558
wavelet.LHH_glrlm_RunPercentage	0.0032
original_firstorder_Mean	0.4403
wavelet.LHH_glrlm_ShortRunEmphasis	0.0009
wavelet.HLH_gldm_LargeDependenceEmphasis	7.4116
wavelet.LHL_glrlm_RunLengthNonUniformityNormalized	0.0645
