# Supplementary material
Source: publisher figshare collection journal article supplement (https://future-science-group.figshare.com/articles/dataset/_/19367861)
Supplement: Supplementary file 1 [file 1]

**Supplementary Table S1: Extraction of radiomics features**

| Feature classes          | Parameter                                         |
|--------------------------|---------------------------------------------------|
| First order features =18 | Maximum                                           |
|                          | Minimum                                           |
|                          | Median                                            |
|                          | Mean                                              |
|                          | Variance                                          |
|                          | Energy                                            |
|                          | Total Energy                                      |
|                          | Standard deviation                                |
|                          | Skewness                                          |
|                          | Kurtosis                                          |
|                          | Root mean square (RMS)                            |
|                          | Mean Absolute Deviation                           |
|                          | Inter quartile range                              |
|                          | Range                                             |
|                          | Entropy                                           |
|                          | Uniformity                                        |
|                          | 10Percentile                                      |
|                          | 90Percentile                                      |
| Texture Features=836     | Shape=17                                          |
|                          | Gray Level Cooccurrence Matrix (GLCM=24)          |
|                          | Gray Level Run Length Matrix (GLRLM=16)           |
|                          | Gray Level Size Zone Matrix (GLSZM=16)            |
|                          | Gray Level Dependence Matrix (GLDM=14)            |
|                          | Neighboring Gray Tone Difference Matrix (NGTDM=5) |
|                          | Wavelet features=744                              |

**Supplementary Table S2: All univariate survival features were included to discriminate patients with recurrence from those without recurrence ( $p < 0.05$ ).**

*Included as a separate Excel file.*

**Supplementary Table S3: Results of radiomics feature selection and Radiomic-score building.**

| Radiomic Risk | Feature                                | Coefficient |
|---------------|----------------------------------------|-------------|
| Score         |                                        |             |
| AP            | original glcm Cluster Shade            | 0.217       |
| VP            | original glcm MCC                      | 1.23        |
| VP            | wavelet HHH glcm Cluster Shade         | -3.21       |
| VP            | wavelet. HHH glszm Large Area Low Gray | 4.6         |
|               | Level Emphasis                         |             |
| VP            | wavelet. HHH ngtdm Busyness            | 0.0003      |

AP =Arterial phase, VP=venous phase.

**Supplementary Table S4: Interpretation of the semantic and agnostic RRS features**

| Features       | Feature             | Interpretation                                                                                                                       |
|----------------|---------------------|--------------------------------------------------------------------------------------------------------------------------------------|
| classification | name                |                                                                                                                                      |
| GLCM[1]        | Cluster Shade       | Reflect the image gray level information, but                                                                                        |
|                | MCC                 | also express the occurrence frequency of                                                                                             |
|                | glcm Cluster Shade  | specific pixel values in a given spatial relationship                                                                                |
| GLSZM[2]       | Large Area Low Gray | Local brightness and complexity of the                                                                                               |
|                | Level Emphasis      | lesion, and reflects the texture heterogeneity between pixels                                                                        |
| NGTDM[3-5]     | HHH ngtdm Busyness  | Captures intensity values of a neighborhood of pixels to characterize the difference between a center voxel within the neighborhood. |

GLCM: gray-level co-occurrence matrices, GLSZM: gray level region size matrix, NGTDM: neighboring gray-tone difference matrix

## References

1. Gang GJ, Deshpande R, Stayman JW. Standardization of histogram- and gray-level co-occurrence matrices-based radiomics in the presence of blur and noise. *Phys. Med. Biol.* 66(7), 074004 (2021).
2. Suárez-García JG, Hernández-López JM, Moreno-Barbosa E, De Celis-Alonso B. A simple model for glioma grading based on texture analysis applied to conventional brain MRI. *PLoS One* 15(5), e0228972 (2020).
3. Amadasun M, King R. Textural features corresponding to textural properties. *IEEE Trans. Syst. Man Cybern.* 19(5), 1264-1274 (1989).
4. Chen S, Harmon S, Perk T *et al.* Using neighborhood gray tone difference matrix texture features on dual time point PET/CT images to differentiate malignant from benign FDG-avid solitary pulmonary nodules. *Cancer Imaging* 19(1), 56 (2019).
5. Xiao DD, Yan PF, Wang YX, Osman MS, Zhao HY. Glioblastoma and primary central nervous system lymphoma: Preoperative differentiation by using MRI-based 3D texture analysis. *Clin. Neurol. Neurosurg.* 173, 84-90 (2018).
